# Supplementary material for: Green synthesis of reduced graphene oxide/nanopolypyrrole composite: characterization and H2O2 determination in urine
Source: Royal Society of Chemistry journal article supplement (doi:10.1039/c4ra00578c), 2014-01-01
Supplement: c4ra00578c1.pdf [file c4ra00578c1.pdf]

## Supporting information

### Green Synthesis of Reduced Graphene Oxide/nanoPolypyrrole composite: Characterization and H<sub>2</sub>O<sub>2</sub> Determination in Urine

*Erhan Zor<sup>1,2</sup>, Muhammed Esad Saglam<sup>3</sup>, Ilker Akin<sup>4</sup>, Ahmet Ozgur Saf<sup>3</sup>, Haluk Bingol<sup>3\*</sup>,  
Mustafa Ersoz<sup>4,5</sup>*

<sup>1</sup>Science Institute, Selcuk University, Konya, Turkey

<sup>2</sup>Science and Technology Department, A. K. Education Faculty, Necmettin Erbakan University, Konya, Turkey

<sup>3</sup>Department of Chemistry, A. K. Education Faculty, Necmettin Erbakan University, Konya, Turkey

<sup>4</sup>Department of Chemistry, Faculty of Science, Selcuk University, Konya, Turkey

<sup>5</sup>Advanced Technology R&D Center, Selcuk University, Konya, Turkey

**\*Corresponding author:** Haluk Bingol - email: halukbingol@gmail.com, tel. +903323238220 - 5499, fax: +903323238225

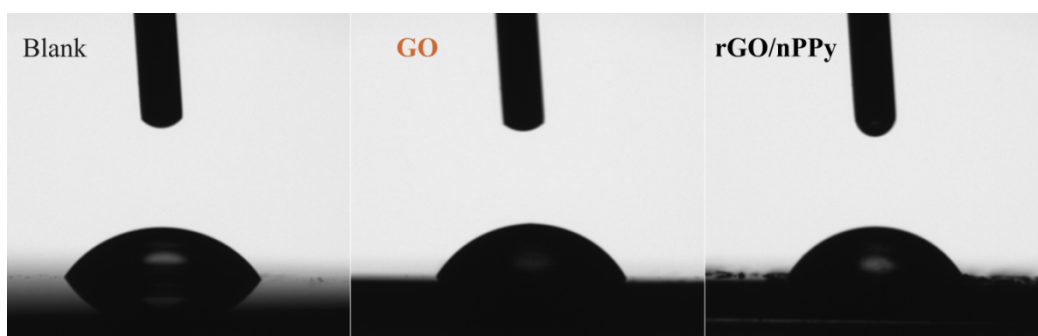

**Figure S1** Water contact angles of blank, GO and rGO/nPPy on the surface of silicon wafer
